# Supplementary material for: Effect of the Polyketone Aromatic Pendent Groups on the Electrical Conductivity of the Derived MWCNTs-Based Nanocomposites
Source: MDPI journal article supplement (doi:10.3390/polym10060618), 2018-06-05
Supplement: s1 [file s1]

# Supplementary Materials: Effect of the Polyketone Aromatic Pendent Groups on the Electrical Conductivity of the Derived MWCNTs-Based Nanocomposites

Nicola Migliore, Lorenzo Massimo Polgar, Rodrigo Araya-Hermosilla, Francesco Picchioni, Patrizio Raffa and Andrea Pucci

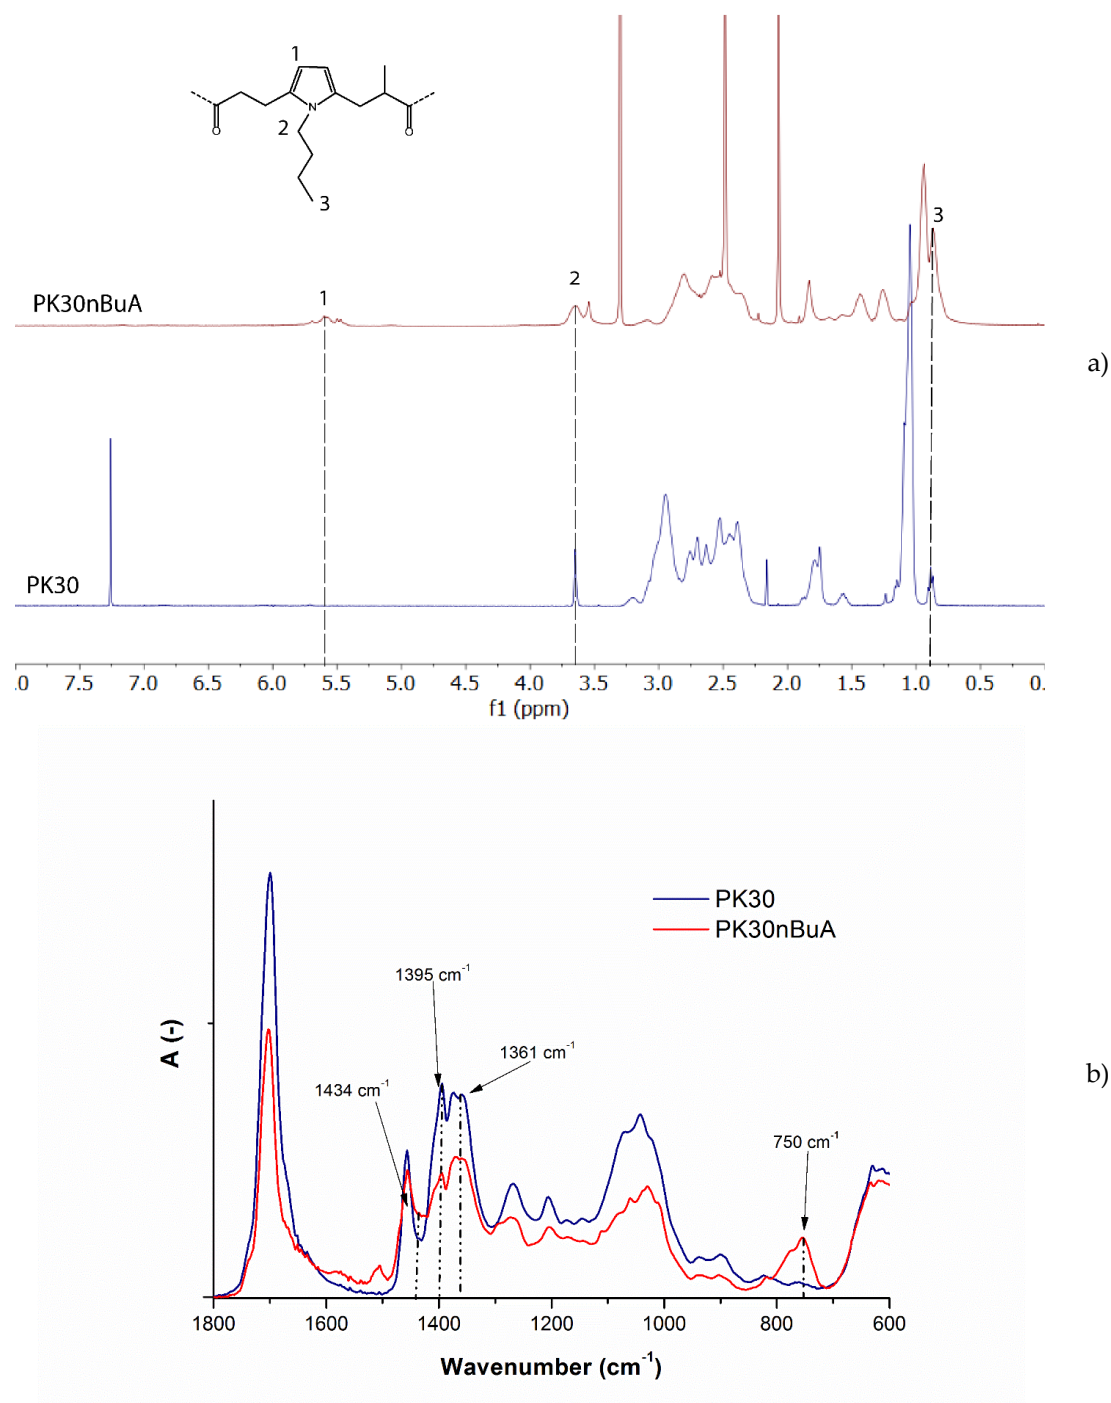

**Figure S1:** a)  $^1\text{H-NMR}$  and b) FT-IR spectra of modified pristine PK30 and PK30nBuA. 1395  $\text{cm}^{-1}$  ( $\text{CH}_2$  twisting) 1361  $\text{cm}^{-1}$  ( $\text{CH}_2$  wagging), 1434  $\text{cm}^{-1}$  (pyrrole ring stretching), 750  $\text{cm}^{-1}$  (aromatic C-H out-of-plane aromatic rings)

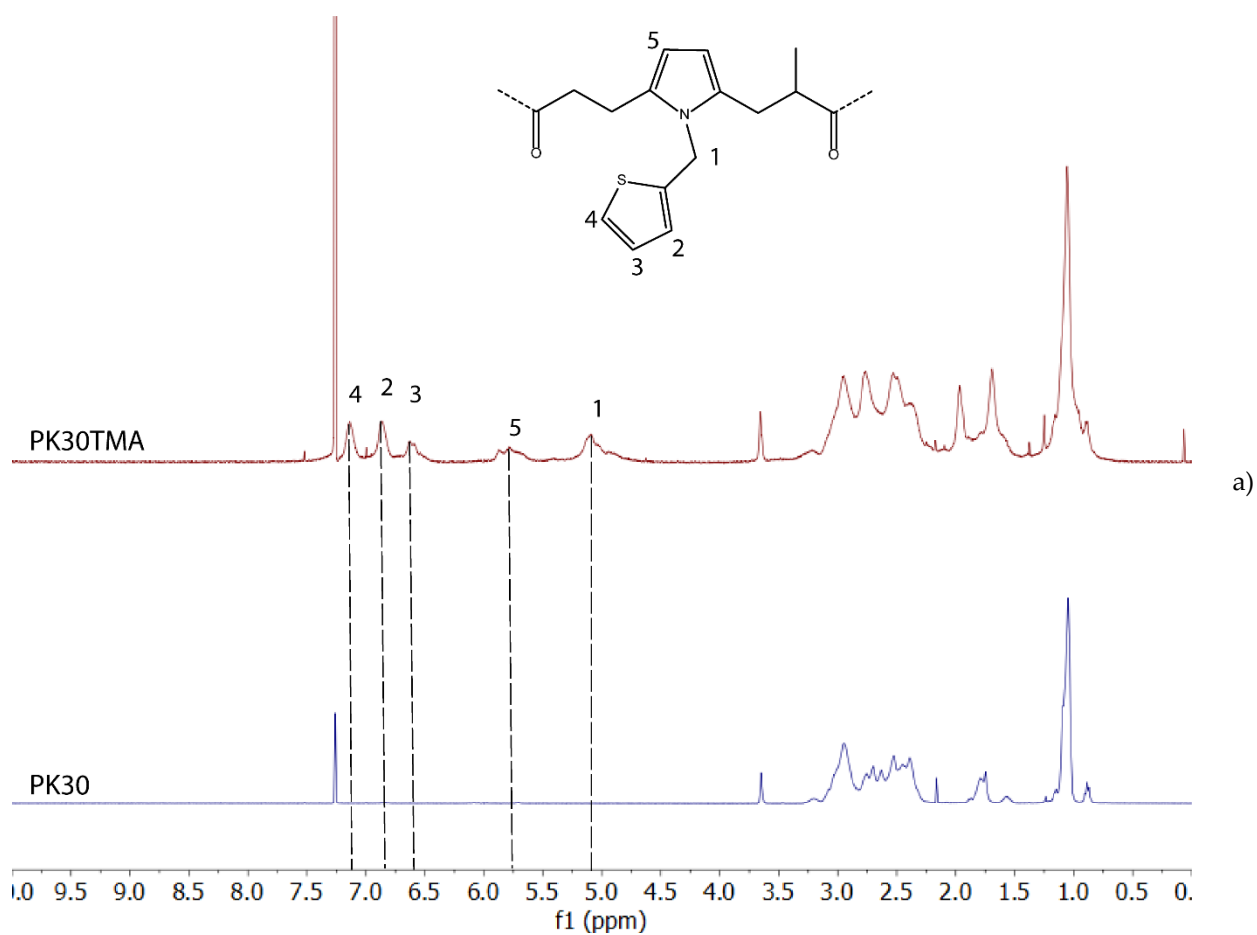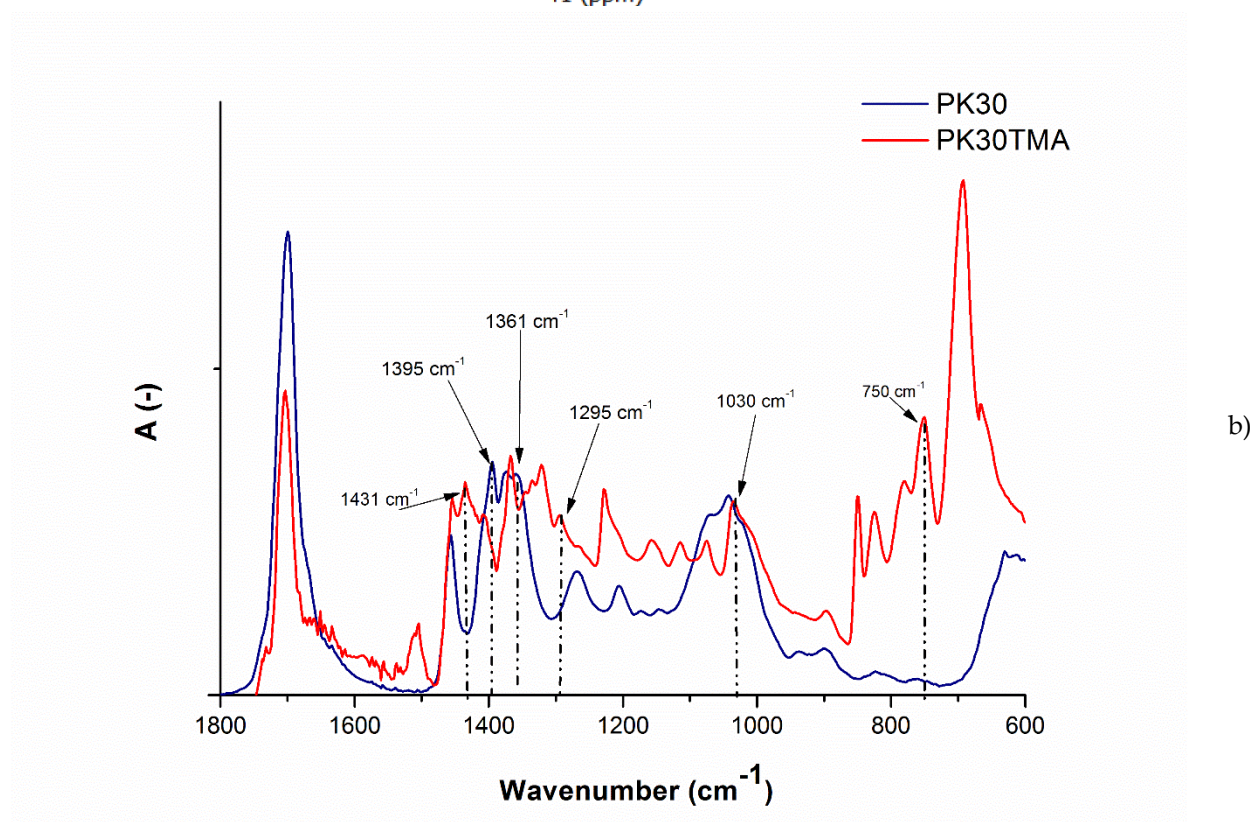

**Figure S2:** a)  $^1\text{H}$ -NMR and b) FT-IR spectra of modified pristine PK30 and PK30TMA. 1395  $\text{cm}^{-1}$  ( $\text{CH}_2$  twisting), 1361  $\text{cm}^{-1}$  ( $\text{CH}_2$  wagging), 1431  $\text{cm}^{-1}$  and 1345  $\text{cm}^{-1}$  (pyrrole and thiophene ring stretching), 1073  $\text{cm}^{-1}$  (thiophene C-C bending), 750  $\text{cm}^{-1}$  (aromatic C-H out-of-plane aromatic rings)

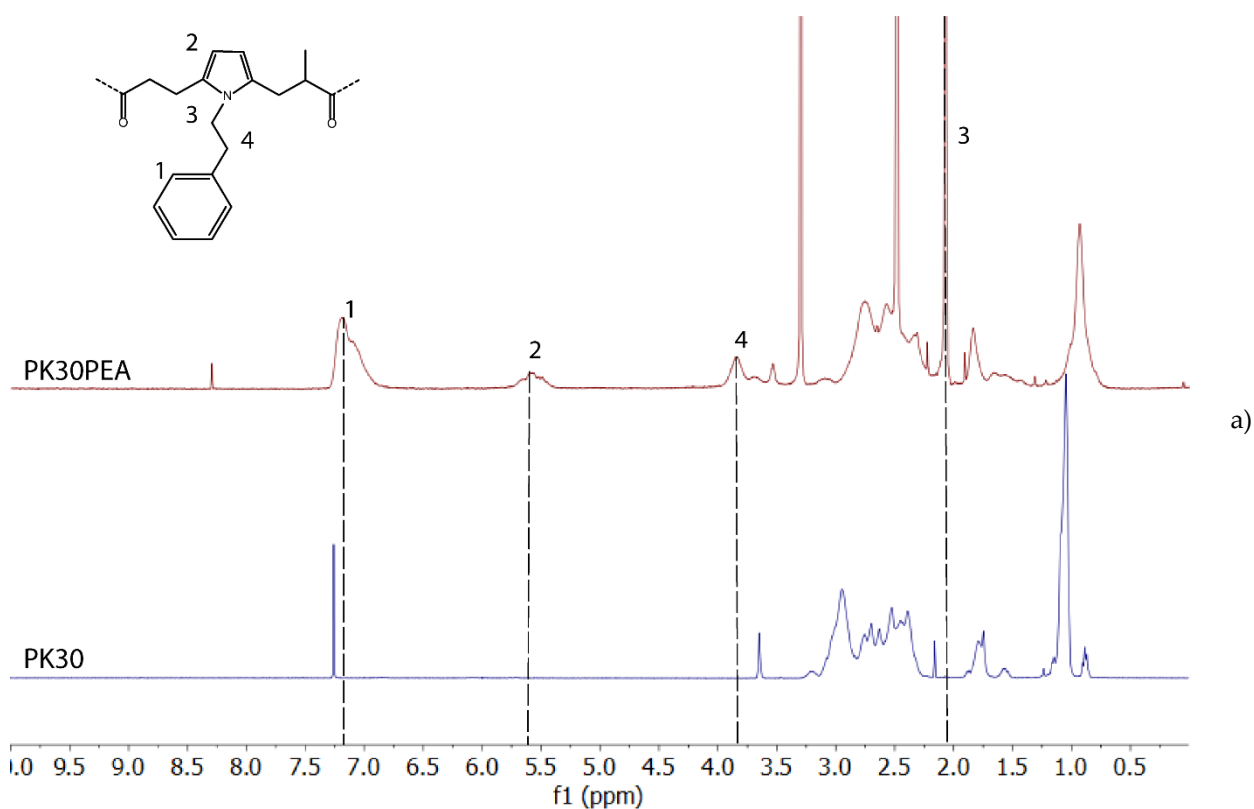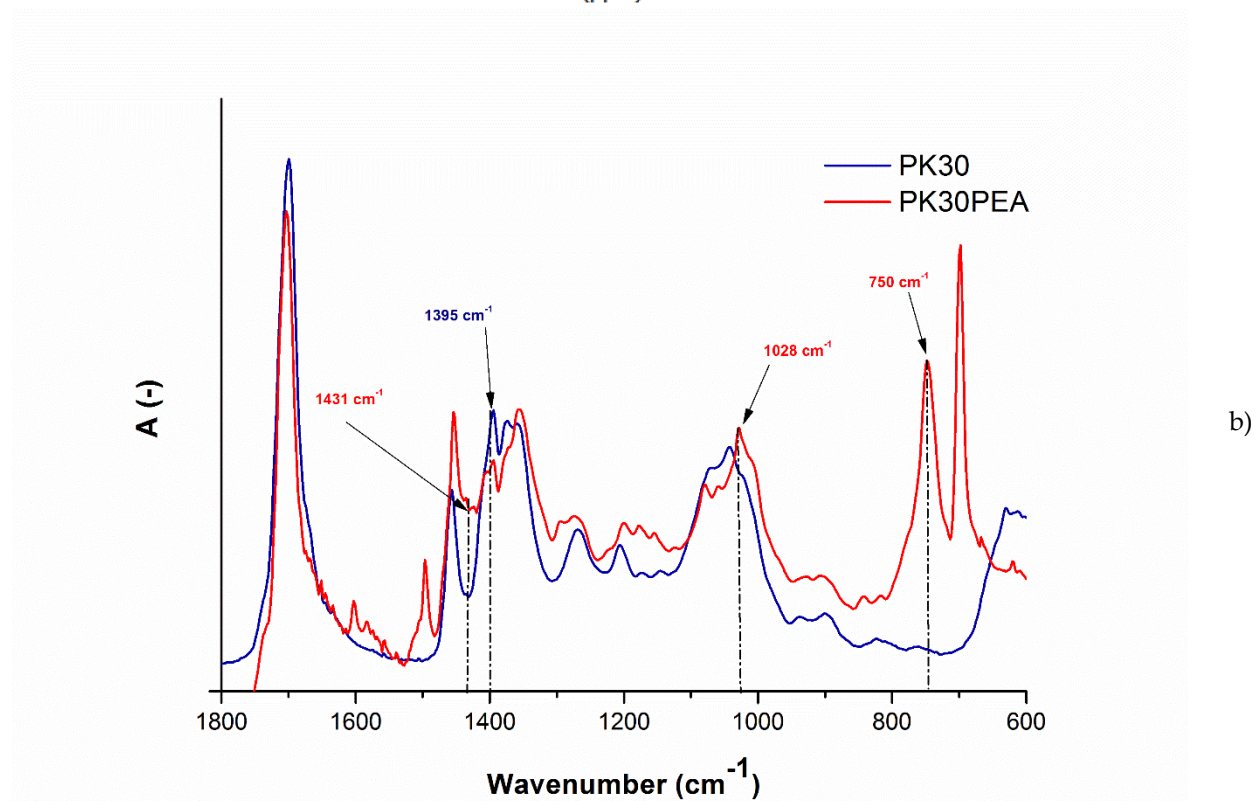

**Figure S3:** a)  $^1\text{H}$ -NMR and b) FT-IR spectra of modified pristine PK30 and PK30PEA. 1395  $\text{cm}^{-1}$  ( $\text{CH}_2$  twisting), 1431  $\text{cm}^{-1}$  (pyrrole ring stretching), 1028  $\text{cm}^{-1}$  (pyrrole C-C), 750  $\text{cm}^{-1}$  (aromatic C-H out-of-plane aromatic rings).



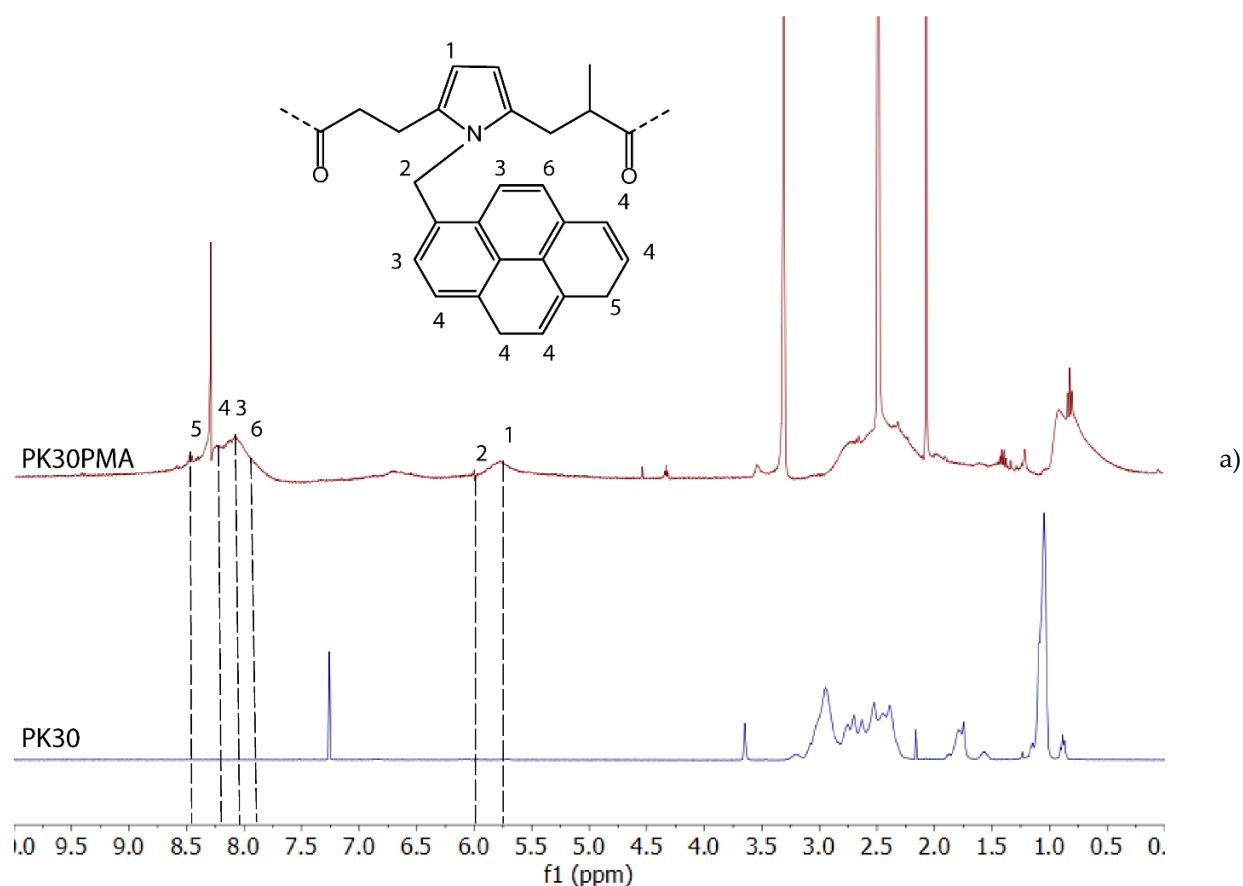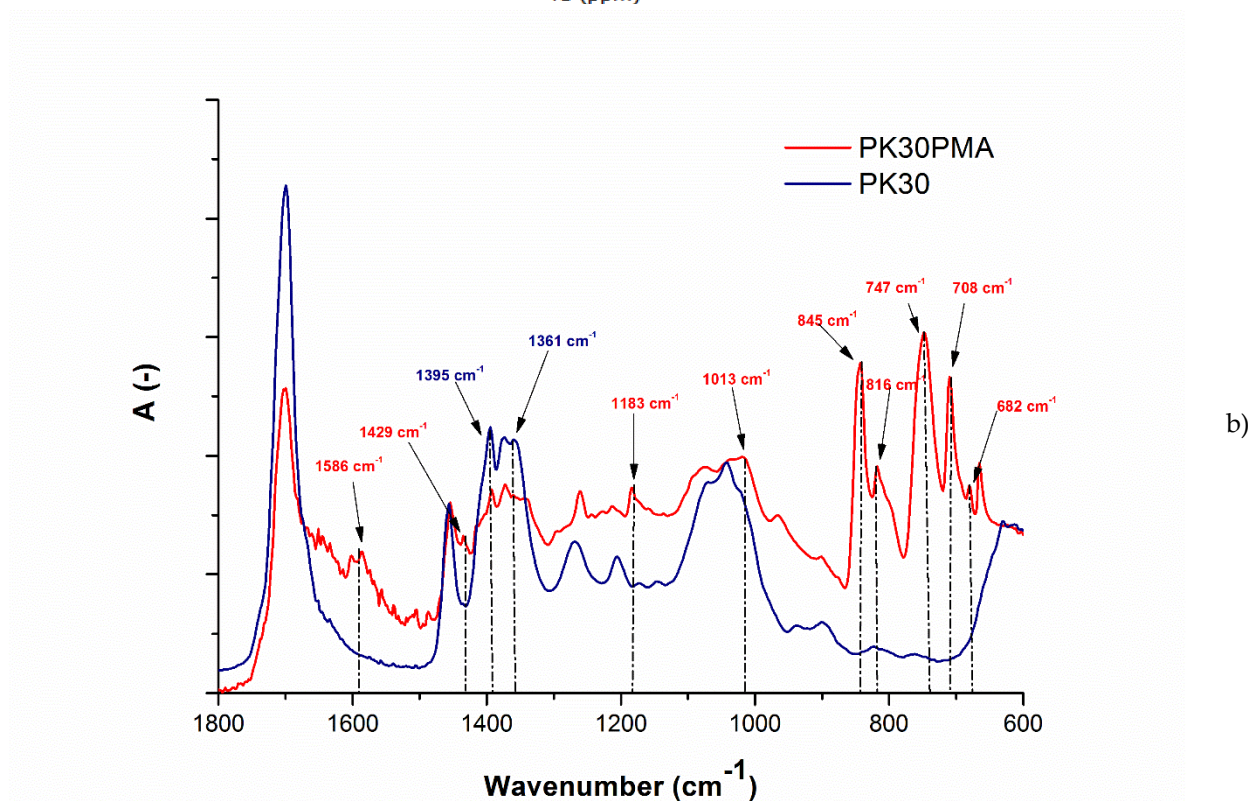

**Figure S4:** a)  $^1\text{H}$ -NMR and b) FT-IR spectra of modified pristine PK30 and PK30PMA. 1395  $\text{cm}^{-1}$  ( $\text{CH}_2$  twisting), 1361  $\text{cm}^{-1}$  ( $\text{CH}_2$  wagging), 708  $\text{cm}^{-1}$  and the moderate absorptions at 1183 and 747  $\text{cm}^{-1}$  are assigned to the out-of-plane vibrations of the three adjacent C-H bonds of the pyrene ring and the newly formed C-C bond between pyrene units, respectively. In addition, the strongest peaks at 845  $\text{cm}^{-1}$  and the weak peaks at 1429 and 1686  $\text{cm}^{-1}$  were assigned to the C=C bonds of the pyrene. Two new peaks at 816 and 682  $\text{cm}^{-1}$  are attributed to the two adjacent C-H bonds of the pyrene ring and the newly formed C-C bond between pyrene units, respectively.

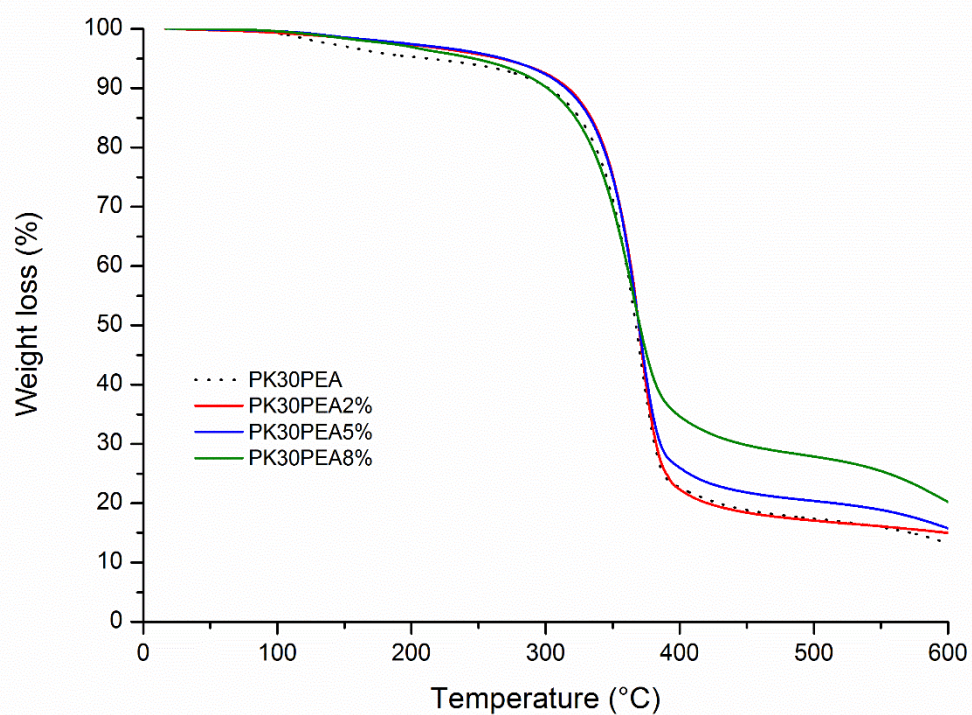

a)

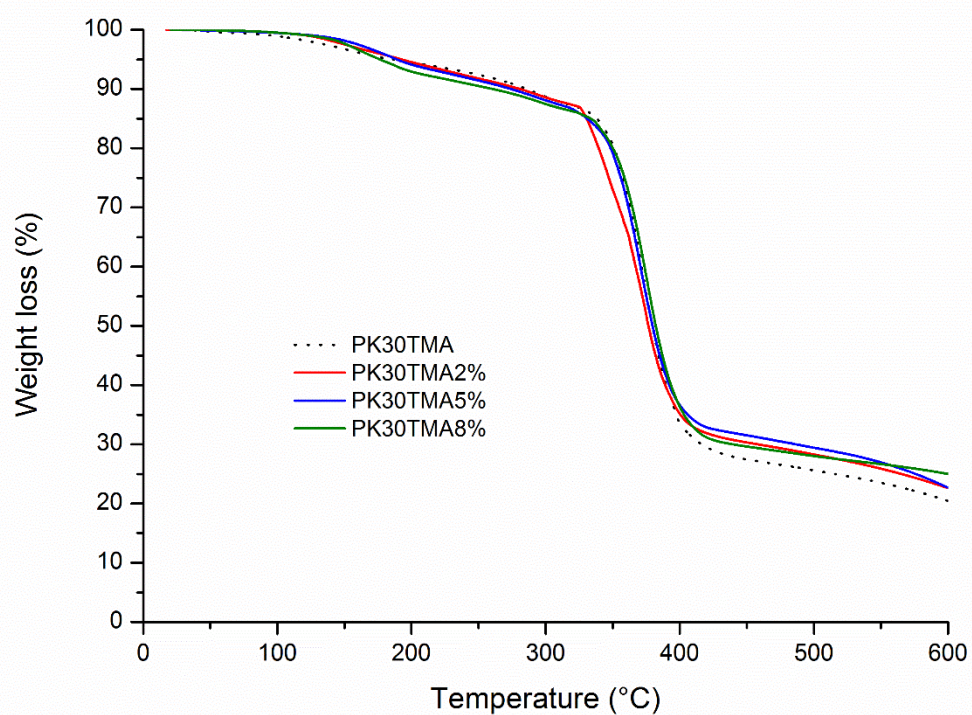

b)

**Figure S5:** TGA curves of a) PK30PEA and b) PK30TMA with 2, 5 and 8 wt. % of MWCNTs.
